# Supplementary material for: Osteogenic and angiogenic activities of silicon-incorporated TiO2 nanotube arrays
Source: Royal Society of Chemistry journal article supplement (doi:10.1039/c6tb01109h), 2016-01-01
Supplement: c6tb01109h1.pdf [file c6tb01109h1.pdf]

## **Osteogenic and angiogenic activities of silicon-incorporated TiO<sub>2</sub> nanotube arrays**

Long Bai<sup>a</sup>, Ruifeng Wu<sup>c</sup>, Yueyue Wang<sup>a</sup>, Xin Wang<sup>a</sup>, Xiangyu Zhang<sup>a</sup>, Xiaobo Huang<sup>a</sup>,  
Lin Qin<sup>a</sup>, Ruiqiang Hang<sup>a,\*</sup>, Lingzhou Zhao<sup>b,\*</sup>, Bin Tang<sup>a</sup>

*<sup>a</sup> Research Institute of Surface Engineering, Taiyuan University of Technology, Taiyuan, China*

*<sup>b</sup> State Key Laboratory of Military Stomatology & National Clinical Research Center for Oral Diseases & Shaanxi Key Laboratory of Oral Diseases, Department of Periodontology, School of Stomatology, The Fourth Military Medical University, Xi'an, China*

*<sup>c</sup> Department of Orthopedics, Central Hospital of Tongchuan Mining Bureau, Tongchuan, China*

\* Corresponding authors.

*E-mail addresses:* hangruiqiang@tyut.edu.cn (R.Q. Hang)

[zhaolingzhou1983@hotmail.com](mailto:zhaolingzhou1983@hotmail.com) (L.Z. Zhao)

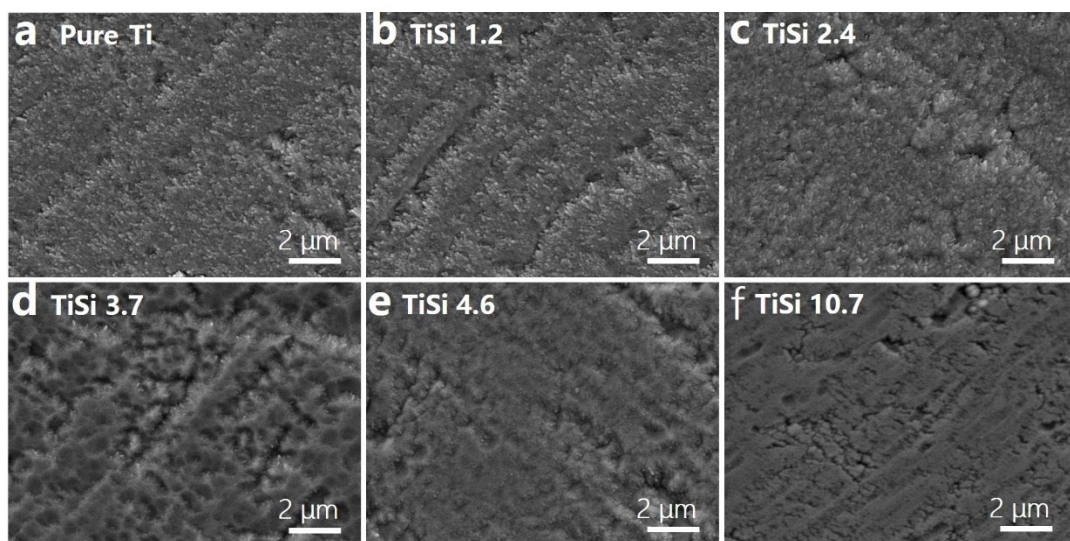

**Fig. S1** SEM images of pure Ti coating (a) and TiSi coatings with different Si contents: (b) 1.2at%, (c) 2.4at%, (d) 3.7at%, (e) 4.6at% and (f) 10.7at%.

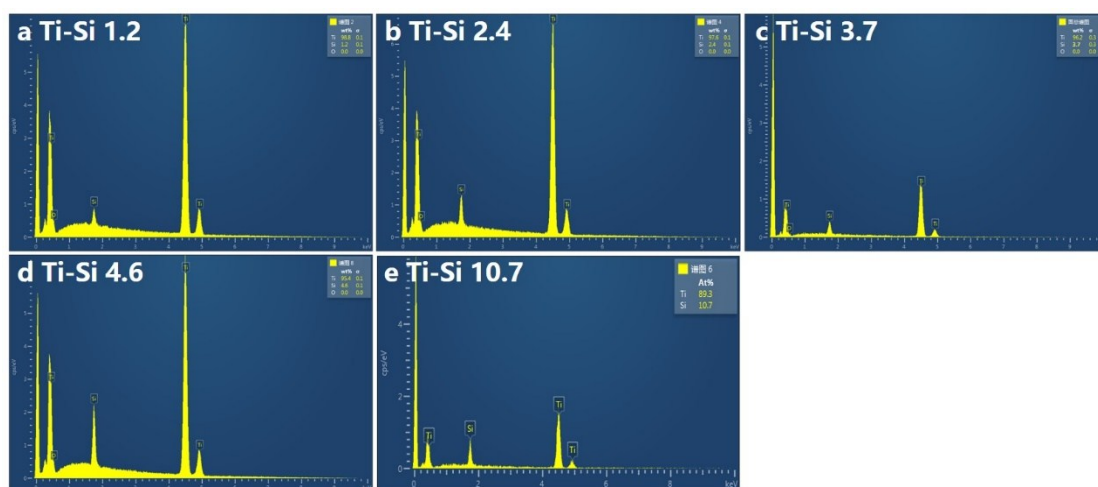

Fig. S2 EDS data of the TiSi coatings.

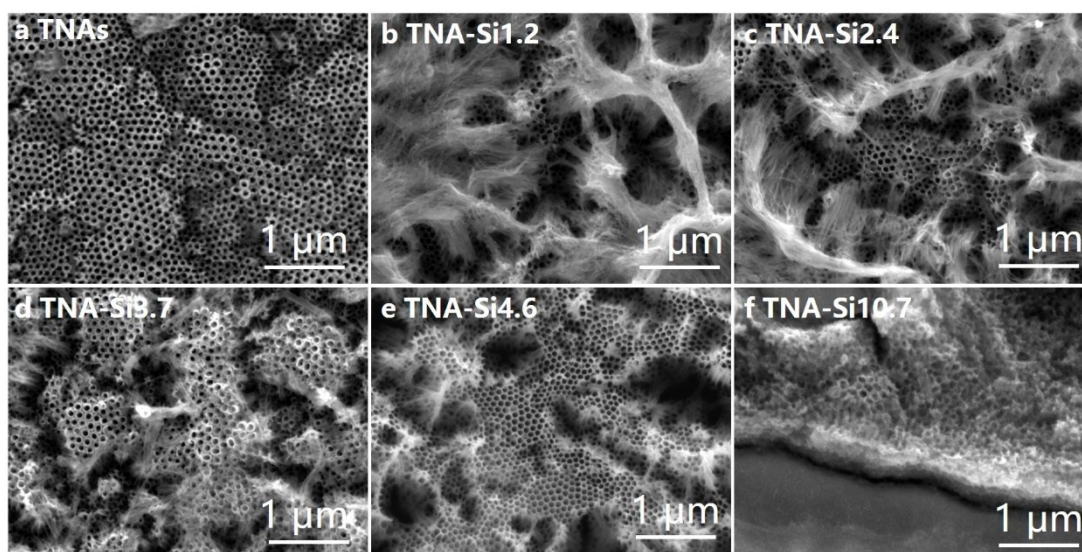

**Fig. S3** Surface morphologies of TNAs (a) and TNA-Sis (b-f) anodized in ethylene glycol electrolyte supplemented with 0.3 wt%  $\text{NH}_4\text{F}$  and 2.0 vol%  $\text{H}_2\text{O}$  at 30 V and room temperature for 4 h.

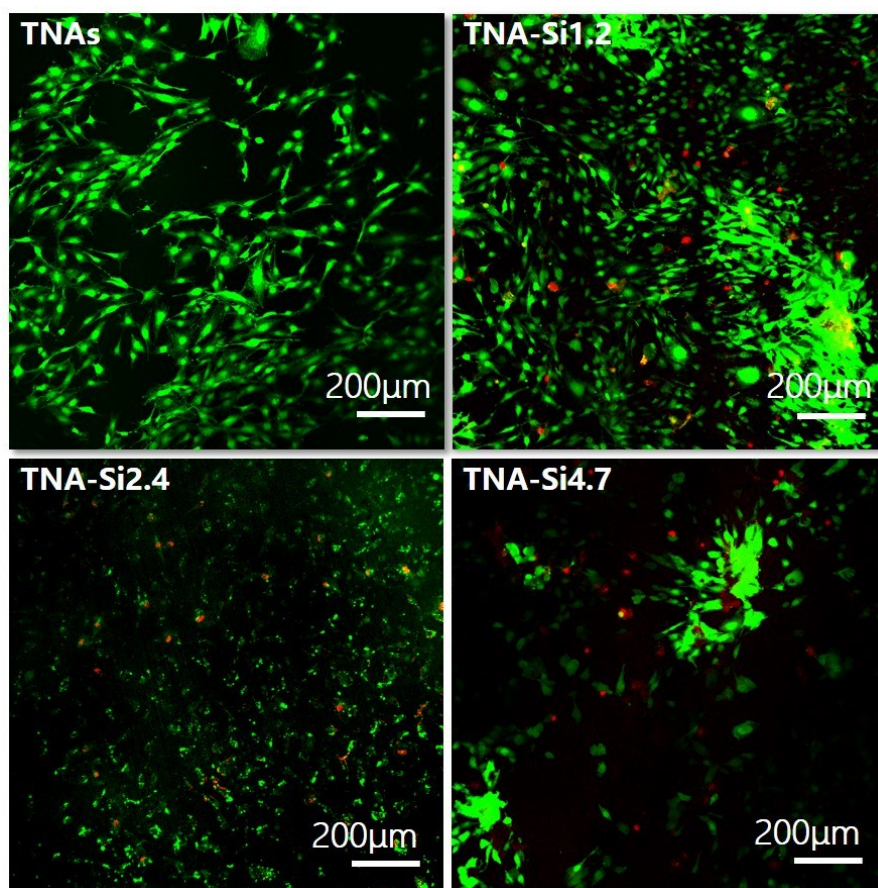

**Fig. S4** Fluorescence images of live/dead staining of osteoblasts after culturing for 3 days on TNAs and TNA-Sis prepared in ethylene glycol electrolyte.

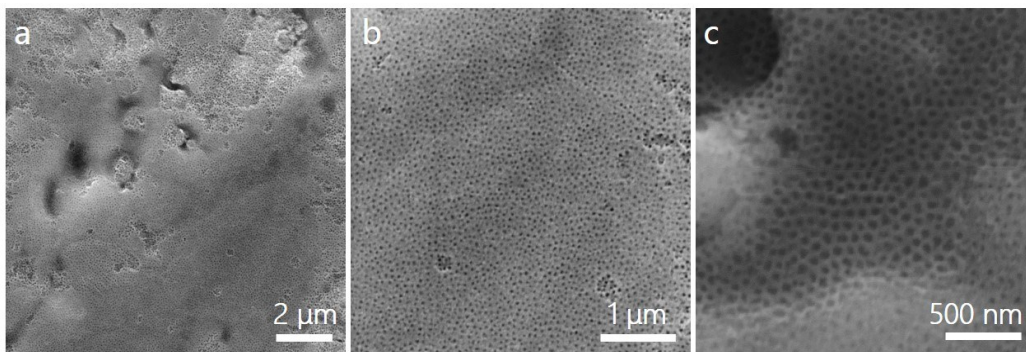

**Fig. S5** Surface morphologies of different magnification of the anodized samples from the TiSi coating of 10.7wt.% Si content.
